# Supplementary material for: Environmental Impact and Relative Invasiveness of Free-Roaming Domestic Carnivores—a North American Survey of Governmental Agencies
Source: MDPI journal article supplement (doi:10.3390/ani7100078), 2017-10-14
Supplement: s1 [file s1]

The following Supplemental Tables represent the data upon which Figures 3 and 4, respectively, are based.

Table S1: Existence of incidents of unconfined dogs, cats, ferrets: impact on wildlife

| Effects on Wildlife                              | Dogs          |                 | Cats          |                 | Ferrets       |                 | p-value                       |
|--------------------------------------------------|---------------|-----------------|---------------|-----------------|---------------|-----------------|-------------------------------|
|                                                  | Mean<br>± sem | Rating<br>Range | Mean<br>± sem | Rating<br>Range | Mean<br>± sem | Rating<br>Range |                               |
| United States, DC and Canada                     |               |                 |               |                 |               |                 |                               |
| Tree-dwelling and/or- nesting birds              | 1.82 ±0.24    | 0-4             | 3.16 ±0.18    | 0-4             | 0.65 ±0.10    | 0-2             | abc p<0.001                   |
| Ground-dwelling and/or- nesting birds            | 2.68 ±0.21    | 0-4             | 3.23 ±0.18    | 0-4             | 0.69 ±0.10    | 0-2             | a ns<br>bc p<0.001            |
| Waterfowl                                        | 2.45 ±0.24    | 0-4             | 2.82 ±0.22    | 0-4             | 0.69 ±0.10    | 0-2             | a ns<br>bc p<0.001            |
| Tree-dwelling animals                            | 1.97 ±0.25    | 0-4             | 2.95 ±0.23    | 0-4             | 0.69 ±0.10    | 0-2             | a p<0.01<br>bc p<0.001        |
| Ground-dwelling animals                          | 2.62 ±0.22    | 0-4             | 3.03 ±0.21    | 0-4             | 0.69 ±0.10    | 0-2             | a ns<br>bc p<0.001            |
| Aquatic animals                                  | 1.86 ±0.26    | 0-4             | 2.27 ±0.27    | 0-4             | 0.67 ±0.10    | 0-2             | a ns<br>bc p<0.001            |
| Threatened, endangered, and/or sensitive species | 2.38 ±0.23    | 0-4             | 3.05 ±0.22    | 0-4             | 0.67 ±0.10    | 0-2             | a p<0.05<br>bc p<0.001        |
| Other [monk seal, big game animals]              | 1.75 ±0.85    | 0-4             | 0.00          | 0               | 0.00          | 0               | -                             |
| Overall Mean:                                    | 2.19          |                 | 2.56          |                 | 0.59          |                 |                               |
| California counties                              |               |                 |               |                 |               |                 |                               |
| Tree-dwelling and/or- nesting birds              | 1.24 ±0.36    | 0-4             | 2.40 ±0.30    | 0-4             | 0.17 ±0.11    | 0-1             | ab p<0.05<br>c p<0.001        |
| Ground-dwelling and/or- nesting birds            | 1.44 ±0.36    | 0-4             | 2.32 ±0.33    | 0-4             | 0.18 ±0.12    | 0-1             | a ns<br>b p<0.05<br>c p<0.001 |
| Waterfowl                                        | 1.63 ±0.40    | 0-4             | 1.67 ±0.21    | 0-4             | 0.18 ±0.12    | 0-1             | a ns<br>b p<0.01<br>c p<0.001 |
| Tree-dwelling animals                            | 1.33 ±0.39    | 0-4             | 1.60 ±0.39    | 0-4             | 0.18 ±0.12    | 0-1             | a ns<br>b p<0.05<br>c p<0.01  |
| Ground-dwelling animals                          | 2.00 ±0.42    | 0-4             | 2.24 ±0.38    | 0-4             | 0.20 ±0.13    | 0-1             | a ns<br>bc p<0.001            |
| Aquatic animals                                  | 0.33 ±0.19    | 0-2             | 0.75 ±0.35    | 0-4             | 0.10 ±0.10    | 0-1             | abc ns                        |
| Threatened, endangered, and/or sensitive species | 1.20 ±0.42    | 0-4             | 1.40 ±0.41    | 0-4             | 0.18 ±0.12    | 0-1             | ab ns<br>c p<0.05             |
| Other [monk seal, big game animals]              | 0.00          | 0               | 0.00          | 0               | 0.00          | 0               | -                             |
| Overall Mean:                                    | 1.15          |                 | 1.55          |                 | 0.15          |                 |                               |

Rating scale: "definite concern": -2, "some concern": -1, "no concern": 0, "some benefit": +1, "definite benefit": +2;); Statistical comparisons: <sup>a</sup> dogs vs. cats, <sup>b</sup> ferrets vs. dogs, <sup>c</sup> ferrets vs. cats; sem: standard error of the mean; ns: nonsignificant.

Table S2: Existence of incidents of unconfined dogs, cats, ferrets: impact on wildlife in parts and recreational areas

| Effects on Parks/Beaches                         | Dogs          |                 | Cats          |                 | Ferrets       |                 | p-value                                                            |
|--------------------------------------------------|---------------|-----------------|---------------|-----------------|---------------|-----------------|--------------------------------------------------------------------|
|                                                  | Mean<br>± sem | Rating<br>Range | Mean<br>± sem | Rating<br>Range | Mean<br>± sem | Rating<br>Range |                                                                    |
| United States, DC and Canada                     |               |                 |               |                 |               |                 |                                                                    |
| Tree-dwelling and/or- nesting birds              | 1.51 ±0.23    | 0-4             | 2.56 ±0.24    | 0-4             | 0.70 ±0.10    | 0-2             | <sup>a</sup> p<0.01<br><sup>b</sup> p<0.05<br><sup>c</sup> p<0.001 |
| Ground-dwelling and/or- nesting birds            | 2.38 ±0.24    | 0-4             | 2.78 ±0.24    | 0-4             | 0.70 ±0.10    | 0-2             | <sup>a</sup> ns<br><sup>bc</sup> p<0.001                           |
| Waterfowl                                        | 2.33 ±0.25    | 0-4             | 2.53 ±0.24    | 0-4             | 0.70 ±0.10    | 0-2             | <sup>a</sup> ns<br><sup>bc</sup> p<0.001                           |
| Tree-dwelling animals                            | 1.74 ±0.24    | 0-4             | 2.56 ±0.26    | 0-4             | 0.66 ±0.11    | 0-2             | <sup>a</sup> p<0.05<br><sup>bc</sup> p<0.001                       |
| Ground-dwelling animals                          | 2.26 ±0.24    | 0-4             | 2.68 ±0.25    | 0-4             | 0.67 ±0.10    | 0-2             | <sup>a</sup> ns<br><sup>bc</sup> p<0.001                           |
| Aquatic animals                                  | 1.74 ±0.24    | 0-4             | 2.00 ±0.26    | 0-4             | 0.71 ±0.12    | 0-2             | <sup>a</sup> ns<br><sup>bc</sup> p<0.001                           |
| Threatened, endangered, and/or sensitive species | 2.17 ±0.24    | 0-4             | 2.63 ±0.25    | 0-4             | 0.69 ±0.10    | 0-2             | <sup>a</sup> ns<br><sup>bc</sup> p<0.001                           |
| Other [monk seal/ humans/ domesticated dogs]     | 2.67 ±1.33    | 0-4             | 2.00 ±2.00    | 0-4             | 0.33 ±0.33    | 0-2             | <sup>abc</sup> ns                                                  |
| Overall Mean:                                    | 2.10          |                 | 2.47          |                 | 0.64          |                 |                                                                    |
| California counties                              |               |                 |               |                 |               |                 |                                                                    |
| Tree-dwelling and/or- nesting birds              | 0.58 ±0.19    | 0-2             | 1.77 ±0.48    | 0-4             | 0.20 ±0.13    | 0-1             | <sup>ac</sup> p<0.05<br><sup>b</sup> ns                            |
| Ground-dwelling and/or- nesting birds            | 1.23 ±0.30    | 0-3             | 1.85 ±0.46    | 0-4             | 0.20 ±0.13    | 0-1             | <sup>a</sup> ns<br><sup>bc</sup> p<0.01                            |
| Waterfowl                                        | 0.92 ±0.23    | 2               | 1.25 ±0.37    | 0-4             | 0.20 ±0.13    | 0-1             | <sup>a</sup> ns<br><sup>bc</sup> p<0.05                            |
| Tree-dwelling animals                            | 0.67 ±0.14    | 0-1             | 1.08 ±0.38    | 0-4             | 0.20 ±0.13    | 0-1             | <sup>a</sup> ns<br><sup>bc</sup> p<0.05                            |
| Ground-dwelling animals                          | 1.38 ±0.33    | 0-4             | 1.54 ±0.40    | 0-4             | 0.20 ±0.13    | 0-1             | <sup>a</sup> ns<br><sup>bc</sup> p<0.01                            |
| Aquatic animals                                  | 0.42 ±0.19    | 0-2             | 0.75 ±0.35    | 0-4             | 0.10 ±0.10    | 0-1             | <sup>abc</sup> ns                                                  |
| Threatened, endangered, and/or sensitive species | 0.75 ±0.25    | 0-2             | 1.25 ±0.41    | 0-4             | 0.20 ±0.13    | 0-1             | <sup>ab</sup> ns<br><sup>c</sup> p<0.05                            |
| Other [monk seal/ humans/ domesticated dogs]     | 4.00          | 4               | 1.00          | 1               | 0.00          | 0               | -                                                                  |
| Overall Mean:                                    | 1.24          |                 | 1.31          |                 | 0.16          |                 |                                                                    |

Rating scale: "definite concern": -2, "some concern": -1, "no concern": 0, "some benefit": +1, "definite benefit": +2;); Statistical comparisons: <sup>a</sup> dogs vs. cats, <sup>b</sup> ferrets vs. dogs, <sup>c</sup> ferrets vs. cats; sem: standard error of the mean; ns: nonsignificant.

**SeaSearch Biological Surveys**  
**DOMESTIC CARNIVORE SURVEY**

**AGENCY INFORMATION**

Federal [    ]    State/Province [    ]    Other [    ] \_\_\_\_\_

Agency: \_\_\_\_\_

\_\_\_\_\_

Division/Unit: \_\_\_\_\_

\_\_\_\_\_

**RESPONDER'S NAME:**

First: \_\_\_\_\_

Middle Int. \_\_\_\_\_

Last: \_\_\_\_\_

Title: \_\_\_\_\_

**MAILING ADDRESS:**

\_\_\_\_\_

\_\_\_\_\_

\_\_\_\_\_

\_\_\_\_\_

**TELEPHONE (w/ Country-City/Area Codes AND Extension):**

\_\_\_\_\_

**FACSIMILE:**

\_\_\_\_\_

**E-MAIL:**

\_\_\_\_\_

**WEBSITE (if applicable):**

\_\_\_\_\_

***THROUGH OUT: ATTACH ADDITIONAL PAGES, AS NEEDED.***

# SeaSearch Biological Surveys

## DOMESTIC CARNIVORE SURVEY

### CLASSIFICATION

Which terms or classification(s) apply to EACH of these animals? Check ALL that apply:

| NAME(S) |                                                | ANIMAL |      |         |
|---------|------------------------------------------------|--------|------|---------|
|         |                                                | Dogs   | Cats | Ferrets |
| I       | "House-Pet" or "Companion"                     |        |      |         |
| II      | "Domestic" or "Domesticated"                   |        |      |         |
| III     | "Exotic animal"                                |        |      |         |
| IV      | "Non-game"                                     |        |      |         |
| V       | "Fur-bearing"                                  |        |      |         |
| VI      | "Laboratory" or "Research"                     |        |      |         |
| VII     | "Wild" or "Wildlife"                           |        |      |         |
| VII     | "Listed" or "Unrestricted" or "Permitted"      |        |      |         |
| IX      | "Unlisted " or "Restricted" or "Not permitted" |        |      |         |
| X       | "Restricted, except under a permit"            |        |      |         |
| XI*     | Other* [Please provide term]                   |        |      |         |
| XII     | [None]                                         |        |      |         |

\*Comments: Please provide clarification and details, as necessary.

---

---

---

---

---

---

---

---

---

---

**ATTACH ADDITIONAL PAGES, AS NEEDED.**

# SeaSearch Biological Surveys

## DOMESTIC CARNIVORE SURVEY

### ANIMAL SIGHTINGS

NOT APPLICABLE [   ]

Please identify SIGHTINGS of UNCONFINED ANIMALS in your jurisdiction.

RATING:    *“Animals have been seen...”*

- 0        Never
- 1        Historically [no in past 10 years]
- 2        Rarely [< 1 time per year]
- 3        Commonly [>1 time per year]
- 4        Frequently [> 5 times per month]
- 5        Unknown

Where appropriate, please add AVERAGE NUMBER OF ANIMALS PER SIGHTING

| SIGHTINGS |                                              | ANIMAL |              |        |              |         |              |
|-----------|----------------------------------------------|--------|--------------|--------|--------------|---------|--------------|
|           |                                              | Dogs   |              | Cats   |              | Ferrets |              |
|           |                                              | Rating | # of animals | Rating | # of animals | Rating  | # of animals |
| I         | Stray animals – urban/suburban               |        |              |        |              |         |              |
| II        | Stray animals – rural/agricultural           |        |              |        |              |         |              |
| III       | Stray animals – parks and recreational areas |        |              |        |              |         |              |
| IV        | Stray animals – wild lands                   |        |              |        |              |         |              |
| V         | Free-living animals (surviving > 1 week)     |        |              |        |              |         |              |
| VI        | Feral (breeding) animals                     |        |              |        |              |         |              |
| VII       | Naturalized animals                          |        |              |        |              |         |              |

Comments: Please provide clarification and details, as necessary.

---



---



---



---

**ATTACH ADDITIONAL PAGES, AS NEEDED.**

# SeaSearch Biological Surveys

## DOMESTIC CARNIVORE SURVEY

### SIGHTINGS OF UNCONFINED ANIMAL POPULATIONS

Please identify SIGHTINGS of unconfined animals in your jurisdiction.

**RATING:** *“Unconfined animals....”*

- |   |                         |   |                                      |
|---|-------------------------|---|--------------------------------------|
| 0 | Definitely do not exist | 2 | Reported to exist                    |
| 1 | Probably do not exist   | 3 | Previously existed, do not exist now |
|   |                         | 4 | Definitely exists now                |

**For RATINGS 2 through 4, please also rate EFFECTS:**

- |   |              |   |                      |   |            |
|---|--------------|---|----------------------|---|------------|
| A | No concern   | D | Some benefit         | F | Don't Know |
| B | Some concern | E | Definitely a benefit | G | No opinion |

| SIGHTINGS |                                              | ANIMAL |        |        |        |         |        |
|-----------|----------------------------------------------|--------|--------|--------|--------|---------|--------|
|           |                                              | Dogs   |        | Cats   |        | Ferrets |        |
|           |                                              | Rating | Effect | Rating | Effect | Rating  | Effect |
| I         | Stray animals – urban/suburban areas         |        |        |        |        |         |        |
| II        | Stray animals – rural/agricultural           |        |        |        |        |         |        |
| III       | Stray animals – parks and recreational areas |        |        |        |        |         |        |
| IV        | Stray animals – wild lands                   |        |        |        |        |         |        |
| V         | Free-living animals (surviving > 1 week)     |        |        |        |        |         |        |
| VI        | Feral (breeding) animals                     |        |        |        |        |         |        |
| VII       | Naturalized animals                          |        |        |        |        |         |        |

Comments: Please provide documentation, if possible.

---



---



---



# SeaSearch Biological Surveys

## DOMESTIC CARNIVORE SURVEY

### EFFECTS ON WILDLIFE

NOT APPLICABLE [    ]

Please identify INCIDENTS of unconfined animals in your jurisdiction. *Please check NOT APPLICABLE if this is not pertinent to your Agency or Jurisdiction.*

RATING: *“Unconfined animals....”*

- |   |                         |   |                                      |
|---|-------------------------|---|--------------------------------------|
| 0 | Definitely do not exist | 2 | Reported to exist                    |
| 1 | Probably do not exist   | 3 | Previously existed, do not exist now |
|   |                         | 4 | Definitely exists now                |

**For RATINGS 2 through 4, please also rate EFFECTS:**

- |   |                      |   |                      |   |            |
|---|----------------------|---|----------------------|---|------------|
| A | No concern           | D | Some benefit         | F | Don't Know |
| B | Some concern         | E | Definitely a benefit | G | No opinion |
| C | Definitely a concern |   |                      |   |            |

| Animal Group |                                                  | ANIMAL |        |        |        |         |        |
|--------------|--------------------------------------------------|--------|--------|--------|--------|---------|--------|
|              |                                                  | Dogs   |        | Cats   |        | Ferrets |        |
|              |                                                  | Rating | Effect | Rating | Effect | Rating  | Effect |
| I            | Tree-dwelling/and/or nesting birds               |        |        |        |        |         |        |
| II           | Ground-dwelling and/or nesting birds             |        |        |        |        |         |        |
| III          | Water fowl                                       |        |        |        |        |         |        |
| IV           | Tree-dwelling animals                            |        |        |        |        |         |        |
| V            | Ground-dwelling animals                          |        |        |        |        |         |        |
| VI           | Aquatic animals                                  |        |        |        |        |         |        |
| VII          | Threatened, Endangered, and/or Sensitive species |        |        |        |        |         |        |
| VIII         | Other: [list/rate]                               |        |        |        |        |         |        |
| IX           |                                                  |        |        |        |        |         |        |
| X            |                                                  |        |        |        |        |         |        |

Comments: Please provide documentation, if possible.

---



---



---



---



---

**ATTACH ADDITIONAL PAGES, AS NEEDED.**

# SeaSearch Biological Surveys

## DOMESTIC CARNIVORE SURVEY

**EFFECTS ON PARKS/BEACHES**

**NOT APPLICABLE [ ]**

Please identify INCIDENTS of unconfined animals in your jurisdiction. *Please check NOT APPLICABLE if this is not pertinent to your Agency or Jurisdiction.*

**RATING: “Unconfined animals....”**

- |   |                         |   |                                       |
|---|-------------------------|---|---------------------------------------|
| 0 | Definitely do not exist | 2 | Reported to exist                     |
| 1 | Probably do not exist   | 3 | Previously existed, doe not exist now |
|   |                         | 4 | Definitely exists now                 |

**For RATINGS 2 through 4, please also rate EFFECTS:**

- |   |                      |   |                      |   |            |
|---|----------------------|---|----------------------|---|------------|
| A | No concern           | D | Some benefit         | F | Don't Know |
| B | Some concern         | E | Definitely a benefit | G | No opinion |
| C | Definitely a concern |   |                      |   |            |

| Animal Group |                                                  | ANIMAL |        |        |        |         |        |
|--------------|--------------------------------------------------|--------|--------|--------|--------|---------|--------|
|              |                                                  | Dogs   |        | Cats   |        | Ferrets |        |
|              |                                                  | Rating | Effect | Rating | Effect | Rating  | Effect |
| I            | Tree-dwelling/and/or nesting birds               |        |        |        |        |         |        |
| II           | Ground-dwelling and/or nesting birds             |        |        |        |        |         |        |
| III          | Water fowl                                       |        |        |        |        |         |        |
| IV           | Tree-dwelling animals                            |        |        |        |        |         |        |
| V            | Ground-dwelling animals                          |        |        |        |        |         |        |
| VI           | Aquatic animals                                  |        |        |        |        |         |        |
| VII          | Threatened, Endangered, and/or Sensitive species |        |        |        |        |         |        |
| VIII         | Other: [list/rate]                               |        |        |        |        |         |        |
| IX           |                                                  |        |        |        |        |         |        |
| X            |                                                  |        |        |        |        |         |        |

Comments: Please provide documentation, if possible.

---



---



---



---



---



---

**ATTACH ADDITIONAL PAGES, AS NEEDED.**

# SeaSearch Biological Surveys

## DOMESTIC CARNIVORE SURVEY

**The following questions concern specific INCIDENTS AND EFFECTS. Please check NOT APPLICABLE if this is not pertinent to your Agency or Jurisdiction.**

### EFFECTS ON AGRICULTURE

NOT APPLICABLE [    ]

Please identify INCIDENTS of unconfined animals in your jurisdiction.

**RATING:**    *“Unconfined animals....”*

- |   |                         |   |                                      |
|---|-------------------------|---|--------------------------------------|
| 0 | Definitely do not exist | 2 | Reported to exist                    |
| 1 | Probably do not exist   | 3 | Previously existed, do not exist now |
|   |                         | 4 | Definitely exists now                |

**For RATINGS 2 through 8, please also rate EFFECTS:**

- |   |                      |   |                      |   |            |
|---|----------------------|---|----------------------|---|------------|
| A | No concern           | D | Some benefit         | F | Don't Know |
| B | Some concern         | E | Definitely a benefit | G | No opinion |
| C | Definitely a concern |   |                      |   |            |

**\*For “documented” RATINGS, please provide EVIDENCE (Attach to Survey)**

| INDUSTRY |                    | ANIMAL |        |        |        |         |        |
|----------|--------------------|--------|--------|--------|--------|---------|--------|
|          |                    | Dogs   |        | Cats   |        | Ferrets |        |
|          |                    | Rating | Effect | Rating | Effect | Rating  | Effect |
| I        | Cattle             |        |        |        |        |         |        |
| II       | Swine              |        |        |        |        |         |        |
| III      | Poultry            |        |        |        |        |         |        |
| IV       | Fisheries          |        |        |        |        |         |        |
| V        | Rabbits            |        |        |        |        |         |        |
| VI       | Crops              |        |        |        |        |         |        |
| VII      | Other: [list/rate] |        |        |        |        |         |        |

Comments: Please provide documentation, if possible.

---

---

---

---

---

---

---

---

---

---

**ATTACH ADDITIONAL PAGES, AS NEEDED.**

## SeaSearch Biological Surveys

## DOMESTIC CARNIVORE SURVEY

## ACTIONS TAKEN

**NOT APPLICABLE [ ]**

**If unconfined animals are encountered in your jurisdiction, what ACTIONS would your Agency take? Please check NOT APPLICABLE if this is not pertinent to your Agency or Jurisdiction.**

**Check ALL that apply: (X)**

| ACTIONS |                                              | ANIMAL |      |         |
|---------|----------------------------------------------|--------|------|---------|
|         |                                              | Dogs   | Cats | Ferrets |
| I       | None: not considered to be important         |        |      |         |
| II      | None: desirable, but not feasible            |        |      |         |
| III     | Live trap/take to shelter (assumed lost pet) |        |      |         |
| IV      | Live trap/euthanize                          |        |      |         |
| V       | Live trap/transport*                         |        |      |         |
| VI      | Take by any means                            |        |      |         |
| VII     | Refer to another agency*                     |        |      |         |
| VIII    | Attempt eradication                          |        |      |         |
| IX      | Unknown                                      |        |      |         |

Comments: Please provide clarification and details, as necessary.

[illegible]

**ATTACH ADDITIONAL PAGES, AS NEEDED.**

## SeaSearch Biological Surveys

## DOMESTIC CARNIVORE SURVEY

## ANIMAL CARE FACILITIES

**NOT APPLICABLE [ ]**

Please list all ANIMAL CARE FACILITIES in your jurisdiction that accepts each type of animal. *Please check NOT APPLICABLE if this is not pertinent to your Agency or Jurisdiction.*

**Check ALL that apply:**

| FACILITIES |                                                   | ANIMAL |      |         |
|------------|---------------------------------------------------|--------|------|---------|
|            |                                                   | Dogs   | Cats | Ferrets |
| I          | None - not considered to be important             |        |      |         |
| II         | None - desirable, but not feasible                |        |      |         |
| III        | Humane Shelters or similar                        |        |      |         |
| IV         | City/County Shelters                              |        |      |         |
| V          | Animal or Breed-specific Shelters/Rescues         |        |      |         |
| VI         | Wildlife Rehabilitation, Refuges                  |        |      |         |
| VII*       | State/Provincial Agencies*<br>[Please List Below] |        |      |         |
| VIII       | Unknown                                           |        |      |         |

\*Comments: Please provide clarification and details, as necessary.

[illegible]

**ATTACH ADDITIONAL PAGES, AS NEEDED.**

**SeaSearch Biological Surveys**  
**DOMESTIC CARNIVORE SURVEY**

Do you have any SPECIAL CONCERNS regarding any of these three animals in your jurisdiction?

***ATTACH ADDITIONAL PAGES, AS NEEDED.***

**A. URBAN / SUBURBAN AREAS** (please describe):

---

---

---

---

---

**B. RURAL / AGRICULTURAL AREAS** (please describe):

---

---

---

---

---

**C. PARKS / RECREATIONAL AREAS** (please describe):

---

---

---

---

---

**D. WILD LANDS / UNDEVELOPED AREAS** (please describe):

---

---

---

---

---

*Thank you for your participation.*

**PLEASE RETURN SURVEY AND ANY ATTACHMENTS.**
